# Supplementary material for: A facile and sensitive detection of pathogenic bacteria using magnetic nanoparticles and optical nanocrystal probes
Source: Royal Society of Chemistry journal article supplement (doi:10.1039/c2an35369e), 2012-01-01
Supplement: c2an35369e.pdf [file c2an35369e.pdf]

## Electronic Supplementary Information

### **The facile and sensitive detection of pathogenic bacteria using magnetic nanoparticles and optical nanocrystal probes**

Jinmyoung Joo, Changyong Yim, Donghoon Kwon, Jaejin Lee, Hwahui Shin, Hyung Joon Cha and Sangmin Jeon\*

Department of Chemical Engineering, Pohang University of Science and Technology (POSTECH), Pohang, Korea

Email: [jeons@postech.ac.kr](mailto:jeons@postech.ac.kr)

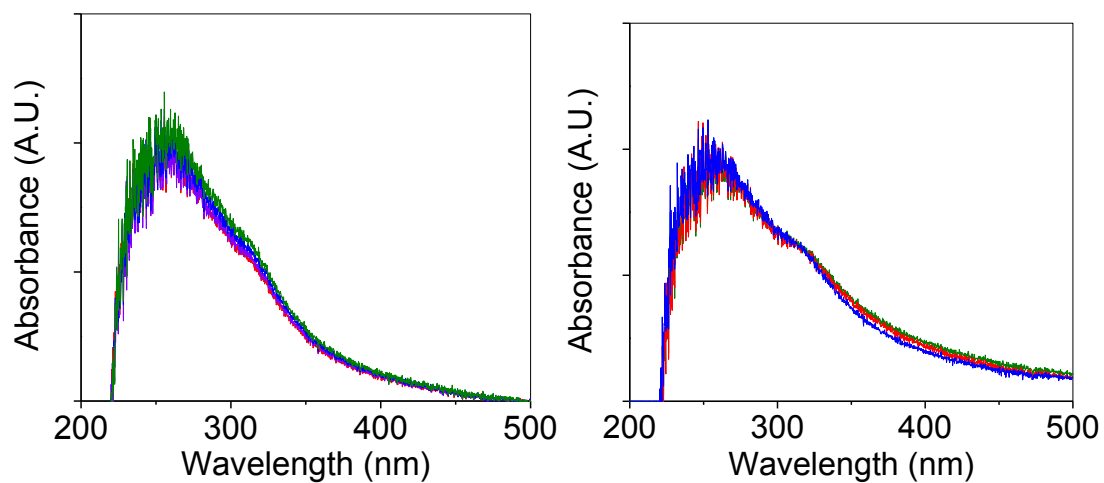

**Fig. S1** Absorption spectra of TNs at (a) different temperatures (red: 15°C, violet: 25°C, blue: 35°C, green: 45°C) and (b) different concentrations of phosphate buffers (green: 1 M, red: 10 mM, blue: 0.1 mM). Negligible changes with temperature and salt concentrations were observed for the absorption spectra of TNs.

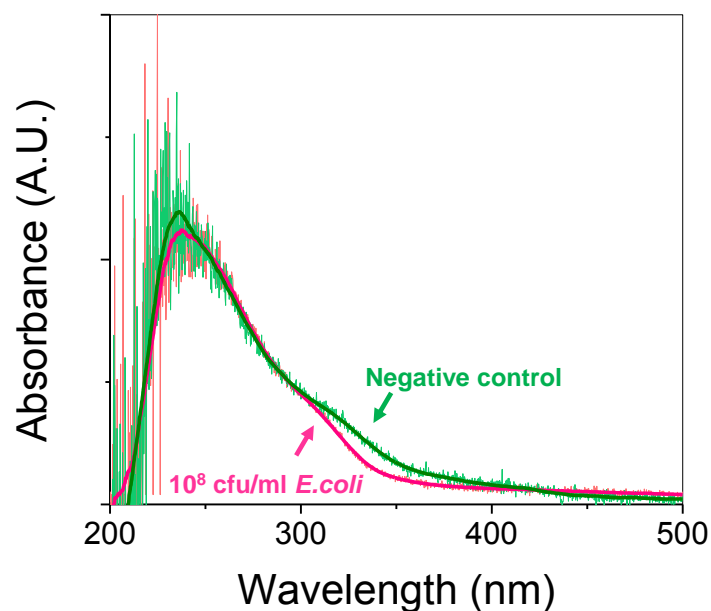

**Fig. S2.** The absorption spectra of unbound TNs after magnetic separation from *E.coli*-spiked milk matrix. The selectivity of the assay was examined by incubating the *salmonella* antibody-conjugated MNPs and TNs in a milk matrix containing 10<sup>8</sup> cfu/ml of *E.coli*. Negligible changes in the absorption spectra were observed in this control experiment, because the detection method relies on the specific binding reaction of target antigen-antibody.
